# Supplementary material
Source: MDPI journal article supplement (https://www.mdpi.com/2227-9717/12/1/47)
Supplement: s1 [file s1]

## *Supplementary Material*

# **Physiological Performance and Biosorption Capacity of *Exiguobacterium* sp. SH31 Isolated from Poly-Extreme Salar de Huasco in the Chilean Altiplano: A study on Rare-Earth Element Tolerance**

**Genesis Serrano <sup>1,2,3</sup>, Jonathan Fortt <sup>4</sup>, Juan Castro-Severyn <sup>4</sup>, Rodrigo Castillo <sup>1</sup>, Claudia Saavedra <sup>5</sup>, Gabriel Krüger <sup>5</sup>, Claudia Núñez <sup>1</sup>, Francisco Remonsellez <sup>2,4</sup> and Karem Gallardo <sup>1,\*</sup>**

<sup>1</sup> Departamento de Química, Facultad de Ciencias, Universidad Católica del Norte, Antofagasta 1270709, Chile; genesis.serrano@alumnos.ucn.cl (G.S.); rocastillo@ucn.cl (R.C.); cnunez@ucn.cl (C.N.)

<sup>2</sup> Centro de Investigación Tecnológica de Agua y Sustentabilidad en el Desierto (CEITSAZA), Facultad de Ingeniería y Ciencias Geológicas, Universidad Católica del Norte, Antofagasta 1270709, Chile; fremonse@ucn.cl

<sup>3</sup> Programa de Doctorado en Ingeniería Sustentable, Facultad de Ingeniería y Ciencias Geológicas, Universidad Católica del Norte, Antofagasta 1270709, Chile

<sup>4</sup> Laboratorio de Microbiología Aplicada y Extremófilos, Departamento de Ingeniería Química, Facultad de Ingeniería y Ciencias Geológicas, Universidad Católica del Norte, Antofagasta 1270709, Chile; jonathan.fortt@ce.ucn.cl (J.F.); juan.castro02@ucn.cl (J.C.-S.)

<sup>5</sup> Laboratorio de Microbiología Molecular, Facultad de Ciencias de la Vida, Universidad Andrés Bello, Santiago 8370251, Chile; csaavedra@unab.cl (C.S.); g.krugercarrasco@gmail.com (G.K.)

\* Correspondence: kgallardo@ucn.cl; Tel.: +56-931-477-286

## 1 Supplementary Tables

Table S1: Anova analysis and Tukey's test of EPS quantification by UV-Vis

|                                                               |           |             |           |                  |               |        |       |       |
|---------------------------------------------------------------|-----------|-------------|-----------|------------------|---------------|--------|-------|-------|
| Analysis of Variance Table                                    |           |             |           |                  |               |        |       |       |
| Response: abs                                                 |           |             |           |                  |               |        |       |       |
|                                                               | Df        | Sum Sq      | Mean Sq   | F value          | Pr(>F)        |        |       |       |
| sample                                                        | 4         | 0.0159323   | 0.0039831 | 36.632           | 6.046e-06 *** |        |       |       |
| Residuals                                                     | 10        | 0.0010873   | 0.0001087 |                  |               |        |       |       |
| ---                                                           |           |             |           |                  |               |        |       |       |
| Signif. codes: 0 '***' 0.001 '**' 0.01 '*' 0.05 '.' 0.1 ' ' 1 |           |             |           |                  |               |        |       |       |
|                                                               |           |             |           |                  |               |        |       |       |
| statistics                                                    |           |             |           |                  |               |        |       |       |
| MSerror                                                       |           | Df          | Mean      | CV               | MSD           |        |       |       |
| 0.0001087333                                                  |           | 10          | 0.4236    | 2.461645         | 0.02802041    |        |       |       |
|                                                               |           |             |           |                  |               |        |       |       |
| \$parameters                                                  |           |             |           |                  |               |        |       |       |
| test name                                                     |           | t           | ntr       | StudentizedRange | alpha         |        |       |       |
| Tukey sample                                                  |           | 5           |           | 4.654293         | 0.05          |        |       |       |
|                                                               |           |             |           |                  |               |        |       |       |
| \$means                                                       |           |             |           |                  |               |        |       |       |
|                                                               | abs       |             | std r     | Min              | Max           | Q25    | Q50   | Q75   |
| control                                                       | 0.4010000 | 0.007211103 | 3         | 0.395            | 0.409         | 0.3970 | 0.399 | 0.404 |
| eu                                                            | 0.4050000 | 0.005291503 | 3         | 0.401            | 0.411         | 0.4020 | 0.403 | 0.407 |
| gd                                                            | 0.4163333 | 0.015307950 | 3         | 0.407            | 0.434         | 0.4075 | 0.408 | 0.421 |
| la                                                            | 0.4076667 | 0.009018500 | 3         | 0.399            | 0.417         | 0.4030 | 0.407 | 0.412 |
| sm                                                            | 0.4880000 | 0.012165525 | 3         | 0.474            | 0.496         | 0.4840 | 0.494 | 0.495 |
|                                                               |           |             |           |                  |               |        |       |       |
| \$comparison                                                  |           |             |           |                  |               |        |       |       |
| NULL                                                          |           |             |           |                  |               |        |       |       |
|                                                               |           |             |           |                  |               |        |       |       |
| \$groups                                                      |           |             |           |                  |               |        |       |       |
| abs groups                                                    |           |             |           |                  |               |        |       |       |
| sm                                                            | 0.4880000 | a           |           |                  |               |        |       |       |
| gd                                                            | 0.4163333 | b           |           |                  |               |        |       |       |
| la                                                            | 0.4076667 | b           |           |                  |               |        |       |       |
| eu                                                            | 0.4050000 | b           |           |                  |               |        |       |       |
| control                                                       | 0.4010000 | b           |           |                  |               |        |       |       |

Table S2: EPS quantification by UV-Vis.

| Samples        | Average | OD <sub>600</sub> | µg CR/OD <sub>600</sub> |
|----------------|---------|-------------------|-------------------------|
| <b>Control</b> | 0.3427  | 1.102             | 0.3110                  |
| <b>Sm</b>      | 0.4297  | 1.098             | 0.3913                  |
| <b>Eu</b>      | 0.3467  | 1.096             | 0.3163                  |
| <b>Gd</b>      | 0.3581  | 1.100             | 0.3255                  |
| <b>La</b>      | 0.3494  | 1.084             | 0.3223                  |

Table S3: % adsorption of REEs onto *Exiguobacterium* sp.

| Samples                | average adsorption<br>% | %RSD |
|------------------------|-------------------------|------|
| <b>SH31 control La</b> | 0.00                    | 0.00 |
| <b>SH31 0.1mM La</b>   | 75.8                    | 7.64 |
| <b>SH31 1mM La</b>     | 93.3                    | 3.61 |
| <b>SH31 control Sm</b> | 0.00                    | 0.00 |
| <b>SH31 0.1mM Sm</b>   | 80.6                    | 22.6 |
| <b>SH31 1mM Sm</b>     | 95.6                    | 1.41 |
| <b>SH31 control Eu</b> | 0.00                    | 0.00 |
| <b>SH31 0.1mM Eu</b>   | 82.4                    | 22.3 |
| <b>SH31 1mM Eu</b>     | 96.8                    | 0.47 |
| <b>SH31 control Gd</b> | 0.00                    | 0.00 |
| <b>SH31 0.1mM Gd</b>   | 76.1                    | 17.9 |
| <b>SH31 1mM Gd</b>     | 95.7                    | 2.25 |

Table S4: % adsorption of REEs onto *Exiguobacterium* sp. at different pH values.

|                 | pH7 - 0 g/L NaCl     |      | pH7.5 - 0 g/L NaCl   |      | pH8 - 0 g/L NaCl     |      |
|-----------------|----------------------|------|----------------------|------|----------------------|------|
| Samples         | average adsorption % | %RSD | average adsorption % | %RSD | average adsorption % | %RSD |
| SH31 control La | 0.00                 | 0.00 | 0.00                 | 0.00 | 0.00                 | 0.00 |
| SH31 0.1mM La   | 75.79                | 0.10 | 99.24                | 0.63 | 99.46                | 0.53 |
| SH31 1mM La     | 93.31                | 0.04 | 99.62                | 0.17 | 99.64                | 0.10 |
| SH31 control Sm | 0.00                 | 0.00 | 0.00                 | 0.00 | 0.00                 | 0.00 |
| SH31 0.1mM Sm   | 80.62                | 0.28 | 99.31                | 0.67 | 99.47                | 0.43 |
| SH31 1mM Sm     | 95.65                | 0.01 | 99.79                | 0.05 | 99.92                | 0.01 |
| SH31 control Eu | 0.00                 | 0.00 | 0.00                 | 0.00 | 0.00                 | 0.00 |
| SH31 0.1mM Eu   | 82.40                | 0.27 | 99.40                | 0.52 | 99.76                | 0.23 |
| SH31 1mM Eu     | 96.79                | 0.00 | 99.83                | 0.07 | 92.42                | 5.25 |
| SH31 control Gd | 0.00                 | 0.00 | 0.00                 | 0.00 | 0.00                 | 0.00 |
| SH31 0.1mM Gd   | 76.15                | 0.24 | 99.37                | 0.65 | 95.84                | 3.62 |
| SH31 1mM Gd     | 95.71                | 0.02 | 99.80                | 0.08 | 99.91                | 0.04 |

Table S5: Adsorption capacity of REEs onto *Exiguobacterium* sp. at different pH values and REE concentration.

|              | pH       | qe (mg/g)<br>La | %RSD  | qe (mg/g)<br>Sm | %RSD | qe (mg/g)<br>Eu | %RSD | qe (mg/g)<br>Gd | %RSD |
|--------------|----------|-----------------|-------|-----------------|------|-----------------|------|-----------------|------|
| <b>0.1mM</b> | <b>7</b> | 1.7546          | 0.10  | 1.8292          | 0.31 | 1.8695          | 0.30 | 1.6897          | 0.28 |
| <b>0.1mM</b> | 7.5      | 2.2890          | 0.13  | 2.2910          | 0.15 | 2.2938          | 0.03 | 2.2905          | 0.28 |
| <b>0.1mM</b> | 8        | 1.6850          | 16.33 | 1.7767          | 2.15 | 2.0267          | 4.10 | 2.1611          | 0.42 |
| <b>1mM</b>   | <b>7</b> | 21.6019         | 0.04  | 22.0587         | 0.02 | 22.3363         | 0.01 | 22.0263         | 0.03 |
| <b>1mM</b>   | 7.5      | 23.0733         | 0.08  | 23.1042         | 0.02 | 23.1132         | 0.02 | 23.1067         | 0.01 |
| <b>1mM</b>   | 8        | 20.9750         | 0.79  | 22.6317         | 0.42 | 22.9247         | 0.28 | 22.5567         | 0.26 |

Table S6: Calculated parameters of Langmuir isotherm

| Metal concentration | pH  | qm    | Kl     | Ce (µg/L) | slope | intercept | RL    | qe   | R <sup>2</sup> |
|---------------------|-----|-------|--------|-----------|-------|-----------|-------|------|----------------|
| 0.1 mM La           | 7   | 1.74  | 29.32  | 3.36      | 0.58  | -0.02     | 0.01  | 1.72 | 1.00           |
|                     | 7.5 |       |        | 0.16      |       |           | 0.18  | 1.43 |                |
|                     | 8   |       |        | 0.13      |       |           | 0.21  | 1.37 |                |
| 1 mM La             | 7   | 21.53 | 33.42  | 9.29      | 0.05  | 0.00      | 0.004 | 1.73 | 1.00           |
|                     | 7.5 |       |        | 0.46      |       |           | 0.07  | 1.62 |                |
|                     | 8   |       |        | 0.44      |       |           | 0.07  | 1.61 |                |
| 0.1 mM Sm           | 7   | 1.81  | 37.93  | 2.92      | 0.55  | -0.01     | 0.01  | 1.72 | 1.00           |
|                     | 7.5 |       |        | 0.14      |       |           | 0.19  | 1.40 |                |
|                     | 8   |       |        | 0.11      |       |           | 0.24  | 1.32 |                |
| 1 mM Sm             | 7   | 22.03 | 113.43 | 6.55      | 0.05  | 0.00      | 0.01  | 1.73 | 1.00           |
|                     | 7.5 |       |        | 0.28      |       |           | 0.11  | 1.55 |                |
|                     | 8   |       |        | 0.10      |       |           | 0.25  | 1.31 |                |
| 0.1 mM Eu           | 7   | 1.86  | 56.81  | 2.67      | 0.54  | -0.01     | 0.01  | 1.71 | 1.00           |
|                     | 7.5 |       |        | 0.13      |       |           | 0.21  | 1.37 |                |
|                     | 8   |       |        | 0.06      |       |           | 0.37  | 1.09 |                |
| 1 mM Eu             | 7   | 22.26 | 46.24  | 4.88      | 0.04  | 0.00      | 0.01  | 1.72 | 1.00           |
|                     | 7.5 |       |        | 0.22      |       |           | 0.13  | 1.50 |                |
|                     | 8   |       |        | 1.35      |       |           | 0.02  | 1.69 |                |
| 0.1 mM Gd           | 7   | 1.65  | 8.33   | 3.75      | 0.61  | -0.07     | 0.01  | 1.72 | 1.00           |
|                     | 7.5 |       |        | 0.15      |       |           | 0.19  | 1.41 |                |
|                     | 8   |       |        | 0.92      |       |           | 0.04  | 1.67 |                |

|                |     |       |        |      |      |      |      |      |      |
|----------------|-----|-------|--------|------|------|------|------|------|------|
| <b>1 mM Gd</b> | 7   | 22.00 | 109.79 | 6.74 | 0.05 | 0.00 | 0.01 | 1.73 | 1.00 |
|                | 7.5 |       |        | 0.26 |      |      | 0.12 | 1.54 |      |
|                | 8   |       |        | 0.12 |      |      | 0.22 | 1.35 |      |

Table S7: Calculated parameters of Freundlich isotherm

| Metal concentration | pH  | KF   | n      | log q <sub>e</sub> | log C <sub>e</sub> | slope | intercept | 1/n   | C <sub>e</sub> <sup>1/n</sup> | q <sub>e</sub> | R <sup>2</sup> |
|---------------------|-----|------|--------|--------------------|--------------------|-------|-----------|-------|-------------------------------|----------------|----------------|
| <b>0.1 mM La</b>    | 7   | 1.94 | -11.94 | 0.24               | 0.53               | -0.08 | 0.29      | -0.08 | 0.90                          | 1.76           | 1.00           |
|                     | 7.5 |      |        | 0.36               | -0.81              |       |           | -0.08 | 1.17                          | 2.27           |                |
|                     | 8   |      |        | 0.36               | -0.90              |       |           | -0.08 | 1.19                          | 2.31           |                |
| <b>1 mM La</b>      | 7   | 22.7 | -45.98 | 1.33               | 0.97               | -0.02 | 1.36      | -0.08 | 0.83                          | 1.61           | 1.00           |
|                     | 7.5 |      |        | 1.36               | -0.34              |       |           | -0.08 | 1.07                          | 2.07           |                |
|                     | 8   |      |        | 1.36               | -0.36              |       |           | -0.08 | 1.07                          | 2.08           |                |
| <b>0.1 mM Sm</b>    | 7   | 1.98 | -14.00 | 0.26               | 0.46               | -0.07 | 0.30      | -0.08 | 0.91                          | 1.78           |                |
|                     | 7.5 |      |        | 0.36               | -0.84              |       |           | -0.08 | 1.18                          | 2.29           |                |
|                     | 8   |      |        | 0.36               | -0.97              |       |           | -0.08 | 1.21                          | 2.34           |                |
| <b>1 mM Sm</b>      | 7   | 22.6 | -81.68 | 1.34               | 0.82               | -0.01 | 1.35      | -0.08 | 0.85                          | 1.66           | 0.96           |
|                     | 7.5 |      |        | 1.36               | -0.56              |       |           | -0.08 | 1.11                          | 2.17           |                |
|                     | 8   |      |        | 1.36               | -0.98              |       |           | -0.08 | 1.21                          | 2.35           |                |
| <b>0.1 mM Eu</b>    | 7   | 1.99 | -17.2  | 0.27               | 0.43               | -0.06 | 0.30      | -0.08 | 0.92                          | 1.79           | 0.97           |
|                     | 7.5 |      |        | 0.36               | -0.90              |       |           | -0.08 | 1.19                          | 2.31           |                |
|                     | 8   |      |        | 0.36               | -1.24              |       |           | -0.08 | 1.27                          | 2.47           |                |
| <b>1 mM Eu</b>      | 7   | 22.8 | -94.2  | 1.35               | 0.69               | -0.01 | 1.36      | -0.08 | 0.88                          | 1.70           | 0.86           |

|                  |     |      |        |      |       |       |      |       |      |      |      |
|------------------|-----|------|--------|------|-------|-------|------|-------|------|------|------|
|                  | 7.5 |      |        | 1.36 | -0.66 |       |      | -0.08 | 1.13 | 2.21 |      |
|                  | 8   |      |        | 1.36 | 0.13  |       |      | -0.08 | 0.98 | 1.89 |      |
| <b>0.1 mM Gd</b> | 7   | 1.99 | -11.0  | 0.23 | 0.57  | -0.09 | 0.30 | -0.08 | 0.90 | 1.74 | 0.83 |
|                  | 7.5 |      |        | 0.36 | -0.83 |       |      | -0.08 | 1.17 | 2.28 |      |
|                  | 8   |      |        | 0.33 | -0.03 |       |      | -0.08 | 1.01 | 1.96 |      |
| <b>1 mM Gd</b>   | 7   | 22.6 | -77.73 | 1.34 | 0.83  | -0.01 | 1.35 | -0.08 | 0.85 | 1.66 | 0.97 |
|                  | 7.5 |      |        | 1.36 | -0.59 |       |      | -0.08 | 1.12 | 2.18 |      |
|                  | 8   |      |        | 1.36 | -0.93 |       |      | -0.08 | 1.20 | 2.32 |      |

Table S8: Calculated parameters of Temkin isotherm

| Metal concentration | pH  | qe    | ln Ce | slope | intercept | B     | bt        | Kt   | R <sup>2</sup> |
|---------------------|-----|-------|-------|-------|-----------|-------|-----------|------|----------------|
| <b>0.1 mM La</b>    | 7   | 1.75  | 1.21  | -0.17 | 1.96      | -0.17 | -14465.26 | 0.00 | 1.00           |
|                     | 7.5 | 2.29  | -1.86 |       |           |       |           |      |                |
|                     | 8   | 2.29  | -2.07 |       |           |       |           |      |                |
| <b>1 mM La</b>      | 7   | 21.6  | 2.23  | -0.49 | 22.68     | -0.49 | -5018.23  | 0.00 | 1.00           |
|                     | 7.5 | 23.1  | -0.78 |       |           |       |           |      |                |
|                     | 8   | 23.1  | -0.83 |       |           |       |           |      |                |
| <b>0.1 mM Sm</b>    | 7   | 1.83  | 1.07  | -0.15 | 1.99      | -0.15 | -16622.56 | 0.00 | 1.00           |
|                     | 7.5 | 2.29  | -1.94 |       |           |       |           |      |                |
|                     | 8   | 2.30  | -2.23 |       |           |       |           |      |                |
| <b>1 mM Sm</b>      | 7   | 22.06 | 1.88  | -0.28 | 22.61     | -0.28 | -8813.72  | 0.00 | 0.96           |
|                     | 7.5 | 23.10 | -1.29 |       |           |       |           |      |                |



|                  |     |       |       |       |       |       |           |      |      |
|------------------|-----|-------|-------|-------|-------|-------|-----------|------|------|
|                  | 8   | 23.13 | -2.27 |       |       |       |           |      |      |
| <b>0.1 mM Eu</b> | 7   | 1.87  | 0.98  | -0.12 | 2.00  | -0.12 | -20178.05 | 0.00 | 0.97 |
|                  | 7.5 | 2.29  | -2.06 |       |       |       |           |      |      |
|                  | 8   | 2.31  | -2.85 |       |       |       |           |      |      |
| <b>1 mM Eu</b>   | 7   | 22.34 | 1.59  | -0.24 | 22.82 | -0.24 | -10099.83 | 0.00 | 0.86 |
|                  | 7.5 | 23.11 | -1.51 |       |       |       |           |      |      |
|                  | 8   | 22.92 | 0.30  |       |       |       |           |      |      |
| <b>0.1 mM Gd</b> | 7   | 1.69  | 1.32  | -0.18 | 2.01  | -0.18 | -13567.31 | 0.00 | 0.85 |
|                  | 7.5 | 2.29  | -1.92 |       |       |       |           |      |      |
|                  | 8   | 2.16  | -0.08 |       |       |       |           |      |      |
| <b>1 mM Gd</b>   | 7   | 22.03 | 1.91  | -0.29 | 22.60 | -0.29 | -8393.80  | 0.00 | 0.97 |
|                  | 7.5 | 23.11 | -1.35 |       |       |       |           |      |      |
|                  | 8   | 23.13 | -2.13 |       |       |       |           |      |      |

Table S9: Proteins of interest related to lanthanides metabolism identified in the genome of *Exiguobacterium* sp. SH31

| Query                  | Uniprot    | Genbank    | Described function                                    | Identity % | QC % |
|------------------------|------------|------------|-------------------------------------------------------|------------|------|
| <b>E_sp_SH31_00083</b> | A0A4P9UL39 | QCW80831.1 | thymidylate synthase                                  | 63.54      | 100  |
| <b>E_sp_SH31_00515</b> | A0A4P9URN0 | QCW83011.1 | phosphate ABC transporter ATP-binding protein         | 61.11      | 90.9 |
| <b>E_sp_SH31_00577</b> | A0A4P9UP51 | QCW81306.1 | elongation factor 4                                   | 61.47      | 98.4 |
| <b>E_sp_SH31_00618</b> | A0A2R5FBI7 | GBG15610.1 | isocitrate dehydrogenase                              | 62.32      | 99.7 |
| <b>E_sp_SH31_00695</b> | A0A4P9ULA6 | QCW80911.1 | methionine adenosyltransferase                        | 61.42      | 98.1 |
| <b>E_sp_SH31_00808</b> | A0A2R5FCJ9 | GBG15942.1 | ATP-dependent Clp protease, protease subunit          | 69.52      | 97.9 |
| <b>E_sp_SH31_01102</b> | A0A4P9ULI7 | QCW81977.1 | glucose-1-phosphate thymidyltransferase               | 63.99      | 88.3 |
| <b>E_sp_SH31_01139</b> | A0A4P9UPR5 | QCW83404.1 | UDP-glucose 4-epimerase GalE                          | 62.32      | 99.7 |
| <b>E_sp_SH31_01275</b> | A0A2R5FB49 | GBG15255.1 | glycine hydroxymethyltransferase                      | 67.00      | 96.6 |
| <b>E_sp_SH31_01398</b> | A0A4P9UTP3 | QCW83086.1 | tryptophan synthase subunit beta                      | 63.73      | 97.9 |
| <b>E_sp_SH31_01486</b> | A0A4P9UU39 | QCW83921.1 | alkylphosphonate utilization protein                  | 71.68      | 100  |
| <b>E_sp_SH31_01652</b> | A0A2R5F6U5 | GBG13927.1 | anthranilate synthase component II                    | 61.70      | 96.9 |
| <b>E_sp_SH31_01720</b> | A0A2R5F3B2 | GBG12619.1 | 2-C-methyl-D-erythritol 2,4-cyclodiphosphate synthase | 63.23      | 98.7 |
| <b>E_sp_SH31_01804</b> | A0A2R5F2R9 | GBG12479.1 | Peroxioredoxin                                        | 68.28      | 99.5 |
| <b>E_sp_SH31_02227</b> | A0A4Y9VUU0 | TFW73423.1 | 5-(carboxyamino)imidazole ribonucleotide mutase       | 63.19      | 93.5 |
| <b>E_sp_SH31_02416</b> | A0A2R5FEX4 | GBG14944.1 | aldehyde dehydrogenase                                | 69.57      | 100  |
| <b>E_sp_SH31_02635</b> | A0A4P9UPT4 | QCW83424.1 | ATP-dependent Clp protease ATP-binding subunit ClpX   | 63.29      | 93.6 |
| <b>E_sp_SH31_02960</b> | A0A4Y9VN60 | TFW69669.1 | succinate--CoA ligase subunit alpha                   | 64.97      | 96.4 |

Table S10: Descriptive statistics for EPS quantification by UV-Vis

| <i>Control</i> |            |       | <i>Eu</i>    |            |       | <i>Gd</i>    |            |       |
|----------------|------------|-------|--------------|------------|-------|--------------|------------|-------|
| Mean           | 0.34273288 |       | Mean         | 0.34673288 |       | Mean         | 0.35806621 |       |
| Standard Err   | 0.00416333 |       | Standard Err | 0.00305505 |       | Standard Err | 0.00883805 |       |
| Median         | 0.34073288 |       | Median       | 0.34473288 |       | Median       | 0.34973288 |       |
| Mode           | #N/A       |       | Mode         | #N/A       |       | Mode         | #N/A       |       |
| Standard Dev   | 0.0072111  |       | Standard Dev | 0.0052915  |       | Standard Dev | 0.01530795 |       |
| Sample Vari    | 5.2E-05    |       | Sample Vari  | 2.8E-05    |       | Sample Vari  | 0.00023433 |       |
| Kurtosis       | #DIV/0!    |       | Kurtosis     | #DIV/0!    |       | Kurtosis     | #DIV/0!    |       |
| Skewness       | 1.15206964 |       | Skewness     | 1.45786297 |       | Skewness     | 1.72373918 |       |
| Range          | 0.014      |       | Range        | 0.01       |       | Range        | 0.027      |       |
| Minimum        | 0.33673288 |       | Minimum      | 0.34273288 |       | Minimum      | 0.34873288 |       |
| Maximum        | 0.35073288 |       | Maximum      | 0.35273288 |       | Maximum      | 0.37573288 |       |
| Sum            | 1.02819864 |       | Sum          | 1.04019864 |       | Sum          | 1.07419864 |       |
| Count          | 3          |       | Count        | 3          |       | Count        | 3          |       |
| Confidence L   | 0.01791337 | <0.05 | Confidence L | 0.01314482 | <0.05 | Confidence L | 0.03802706 | <0.05 |
|                |            |       |              |            |       |              |            |       |
| <i>Sm</i>      |            |       | <i>La</i>    |            |       |              |            |       |
| Mean           | 0.42973288 |       | Mean         | 0.34939955 |       |              |            |       |
| Standard Err   | 0.00702377 |       | Standard Err | 0.00520683 |       |              |            |       |
| Median         | 0.43573288 |       | Median       | 0.34873288 |       |              |            |       |
| Mode           | #N/A       |       | Mode         | #N/A       |       |              |            |       |
| Standard Dev   | 0.01216553 |       | Standard Dev | 0.0090185  |       |              |            |       |
| Sample Vari    | 0.000148   |       | Sample Vari  | 8.1333E-05 |       |              |            |       |
| Kurtosis       | #DIV/0!    |       | Kurtosis     | #DIV/0!    |       |              |            |       |
| Skewness       | -1.6795356 |       | Skewness     | 0.33083181 |       |              |            |       |
| Range          | 0.022      |       | Range        | 0.018      |       |              |            |       |
| Minimum        | 0.41573288 |       | Minimum      | 0.34073288 |       |              |            |       |
| Maximum        | 0.43773288 |       | Maximum      | 0.35873288 |       |              |            |       |
| Sum            | 1.28919864 |       | Sum          | 1.04819864 |       |              |            |       |
| Count          | 3          |       | Count        | 3          |       |              |            |       |
| Confidence L   | 0.03022084 | <0.05 | Confidence L | 0.02240319 | <0.05 |              |            |       |

## 2. Supplementary Figures

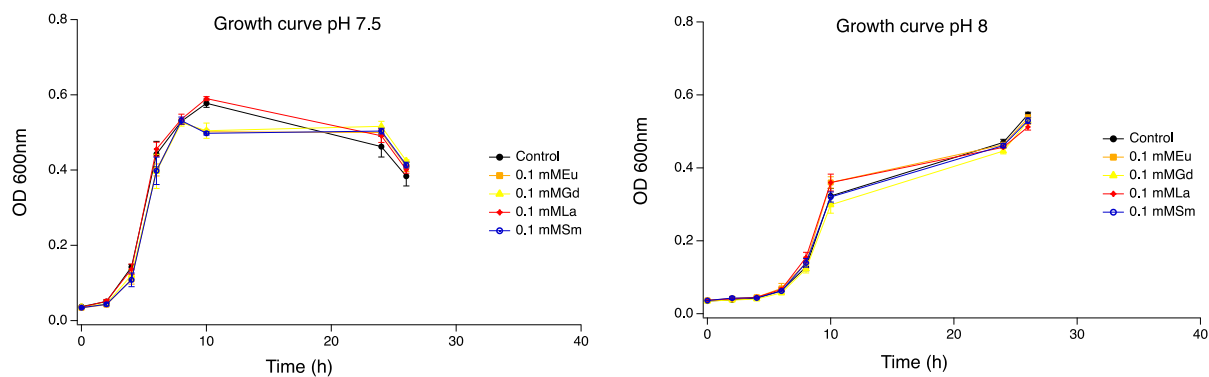

Figure S1: Growth curve of *Exiguobacterium* sp. at pH7.5 and 8 at 0.1mM of REEs. Error bars represent 3 independent replicates.

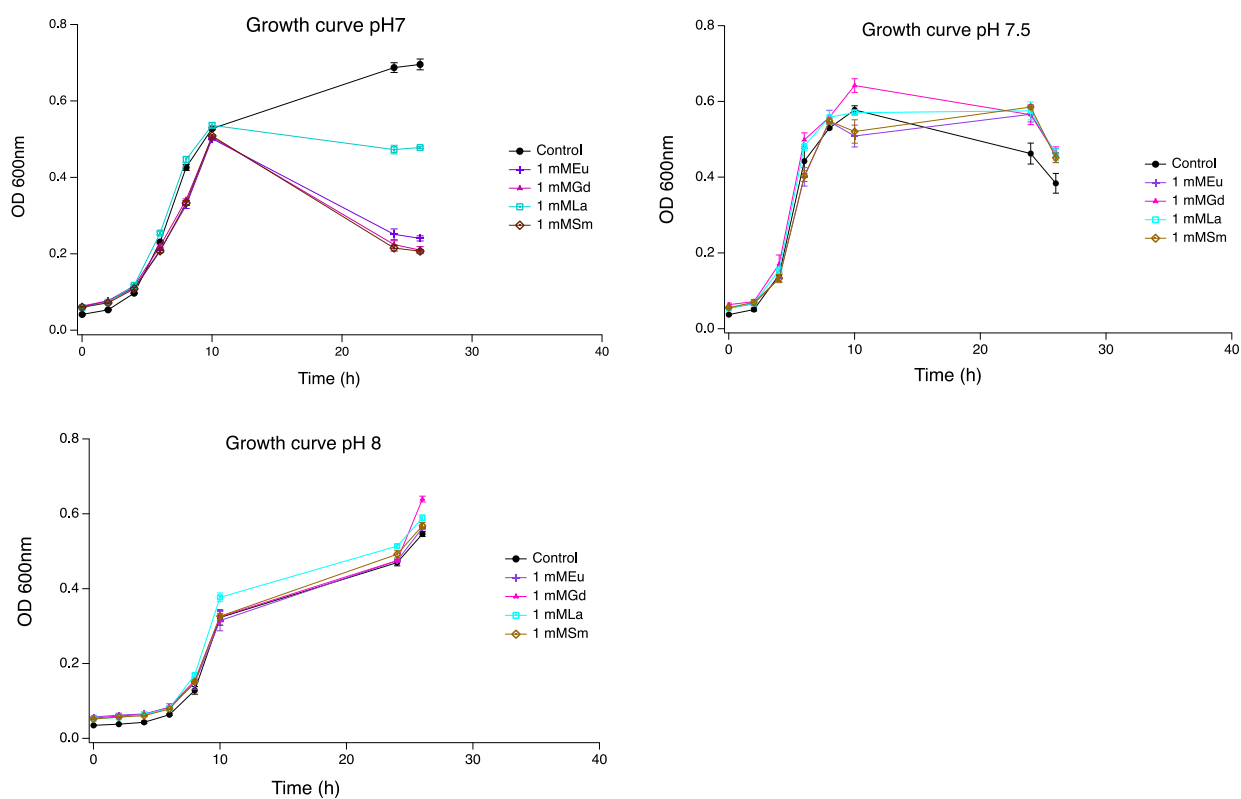

Figure S2: Growth curve of *Exiguobacterium* sp. at pH7, 7.5 and 8 at 1mM of REEs. Error bars represent 3 independent replicates.

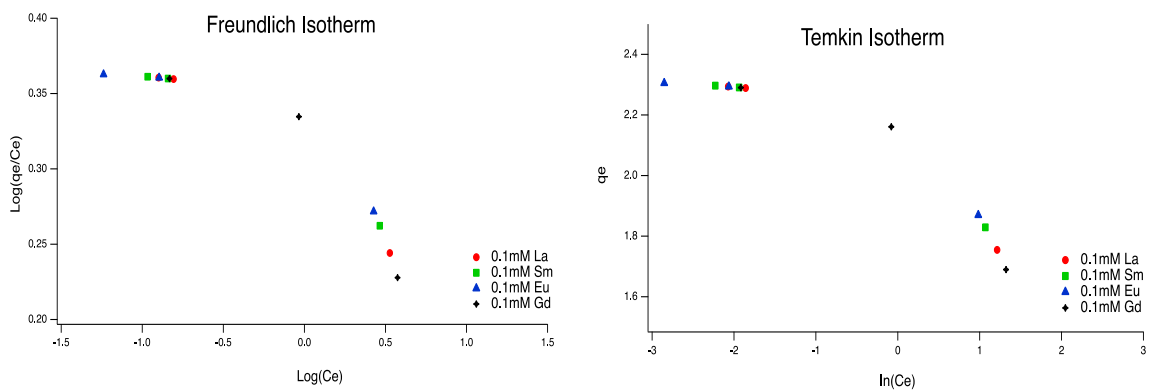

Figure S3: Freundlich and Temkin isotherms experimentally calculated for Rare-earth elements adsorption.
